# Supplementary material for: Evolution of coding and non-coding genes in HOX clusters of a marsupial
Source: PubMed Central journal article supplement (PMC3541083; doi:10.1186/1471-2164-13-251), 2012-06-18
Supplement: 1471-2164-13-251-S4.pdf [file 1471-2164-13-251-S4.pdf]

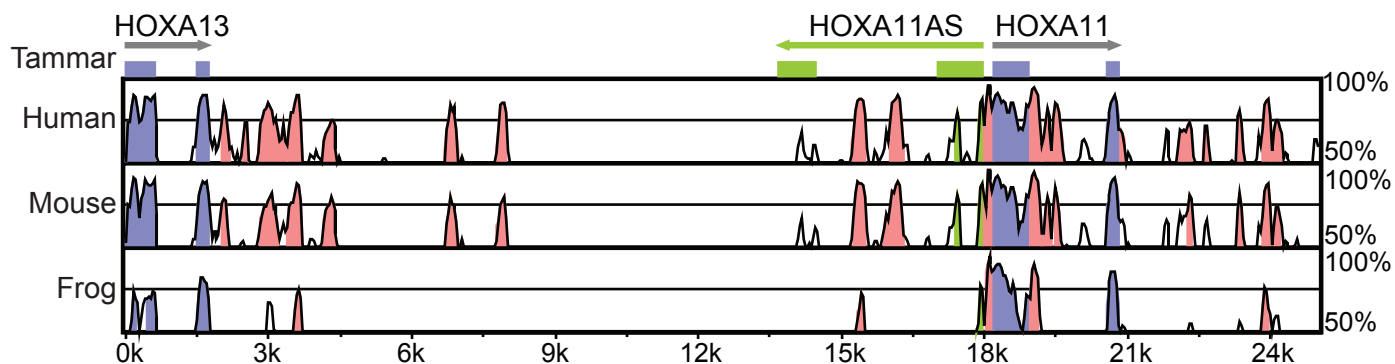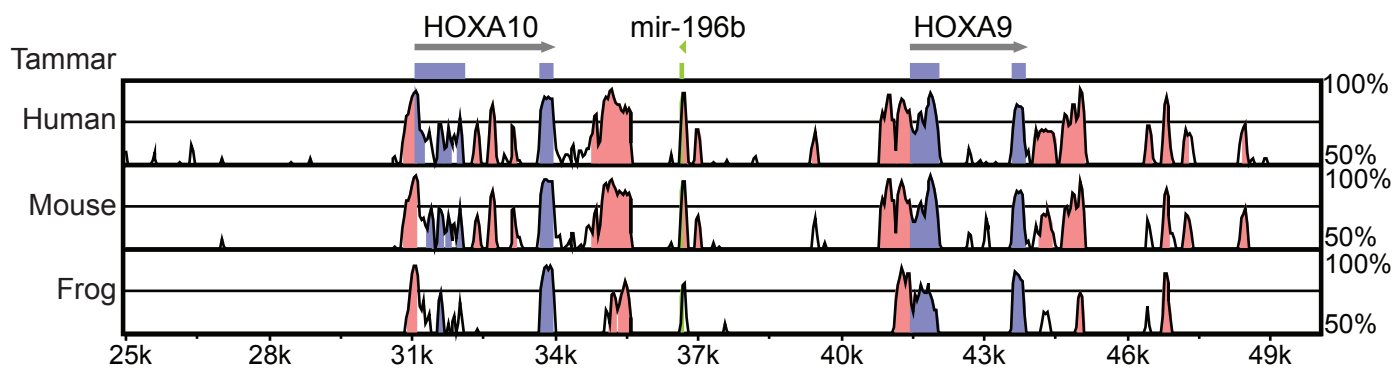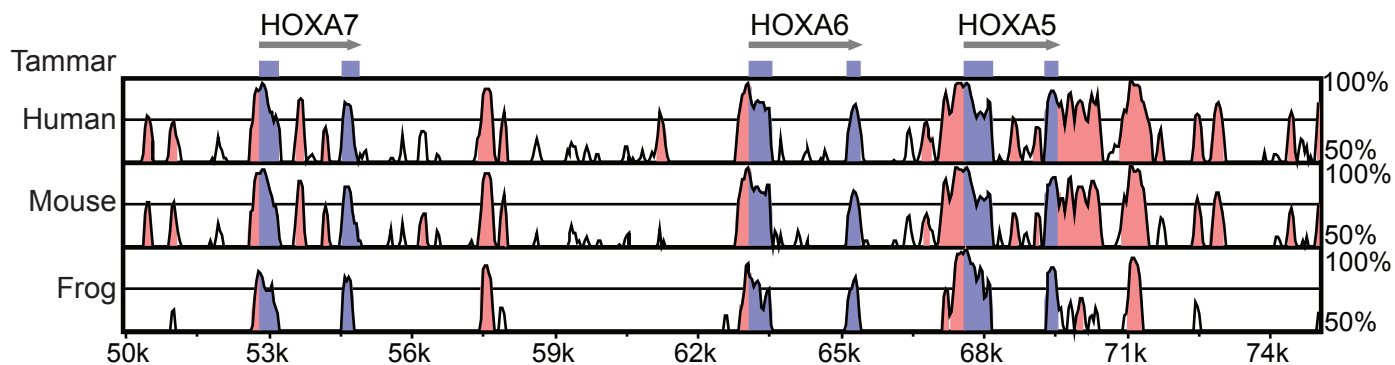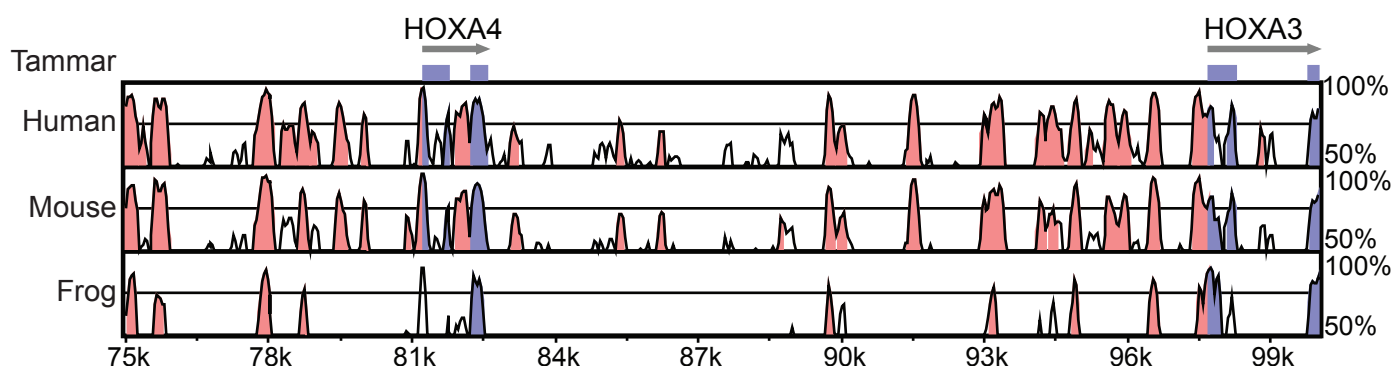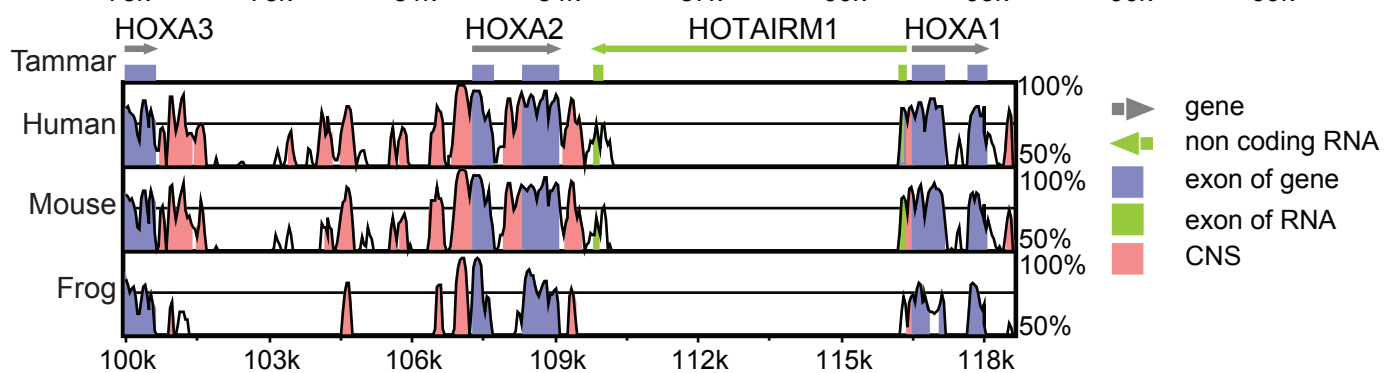

- ▶ gene
- ◀ non coding RNA
- exon of gene
- exon of RNA
- CNS
