# Supplementary material for: Evolution of coding and non-coding genes in HOX clusters of a marsupial
Source: PubMed Central journal article supplement (PMC3541083; doi:10.1186/1471-2164-13-251), 2012-06-18

0.08

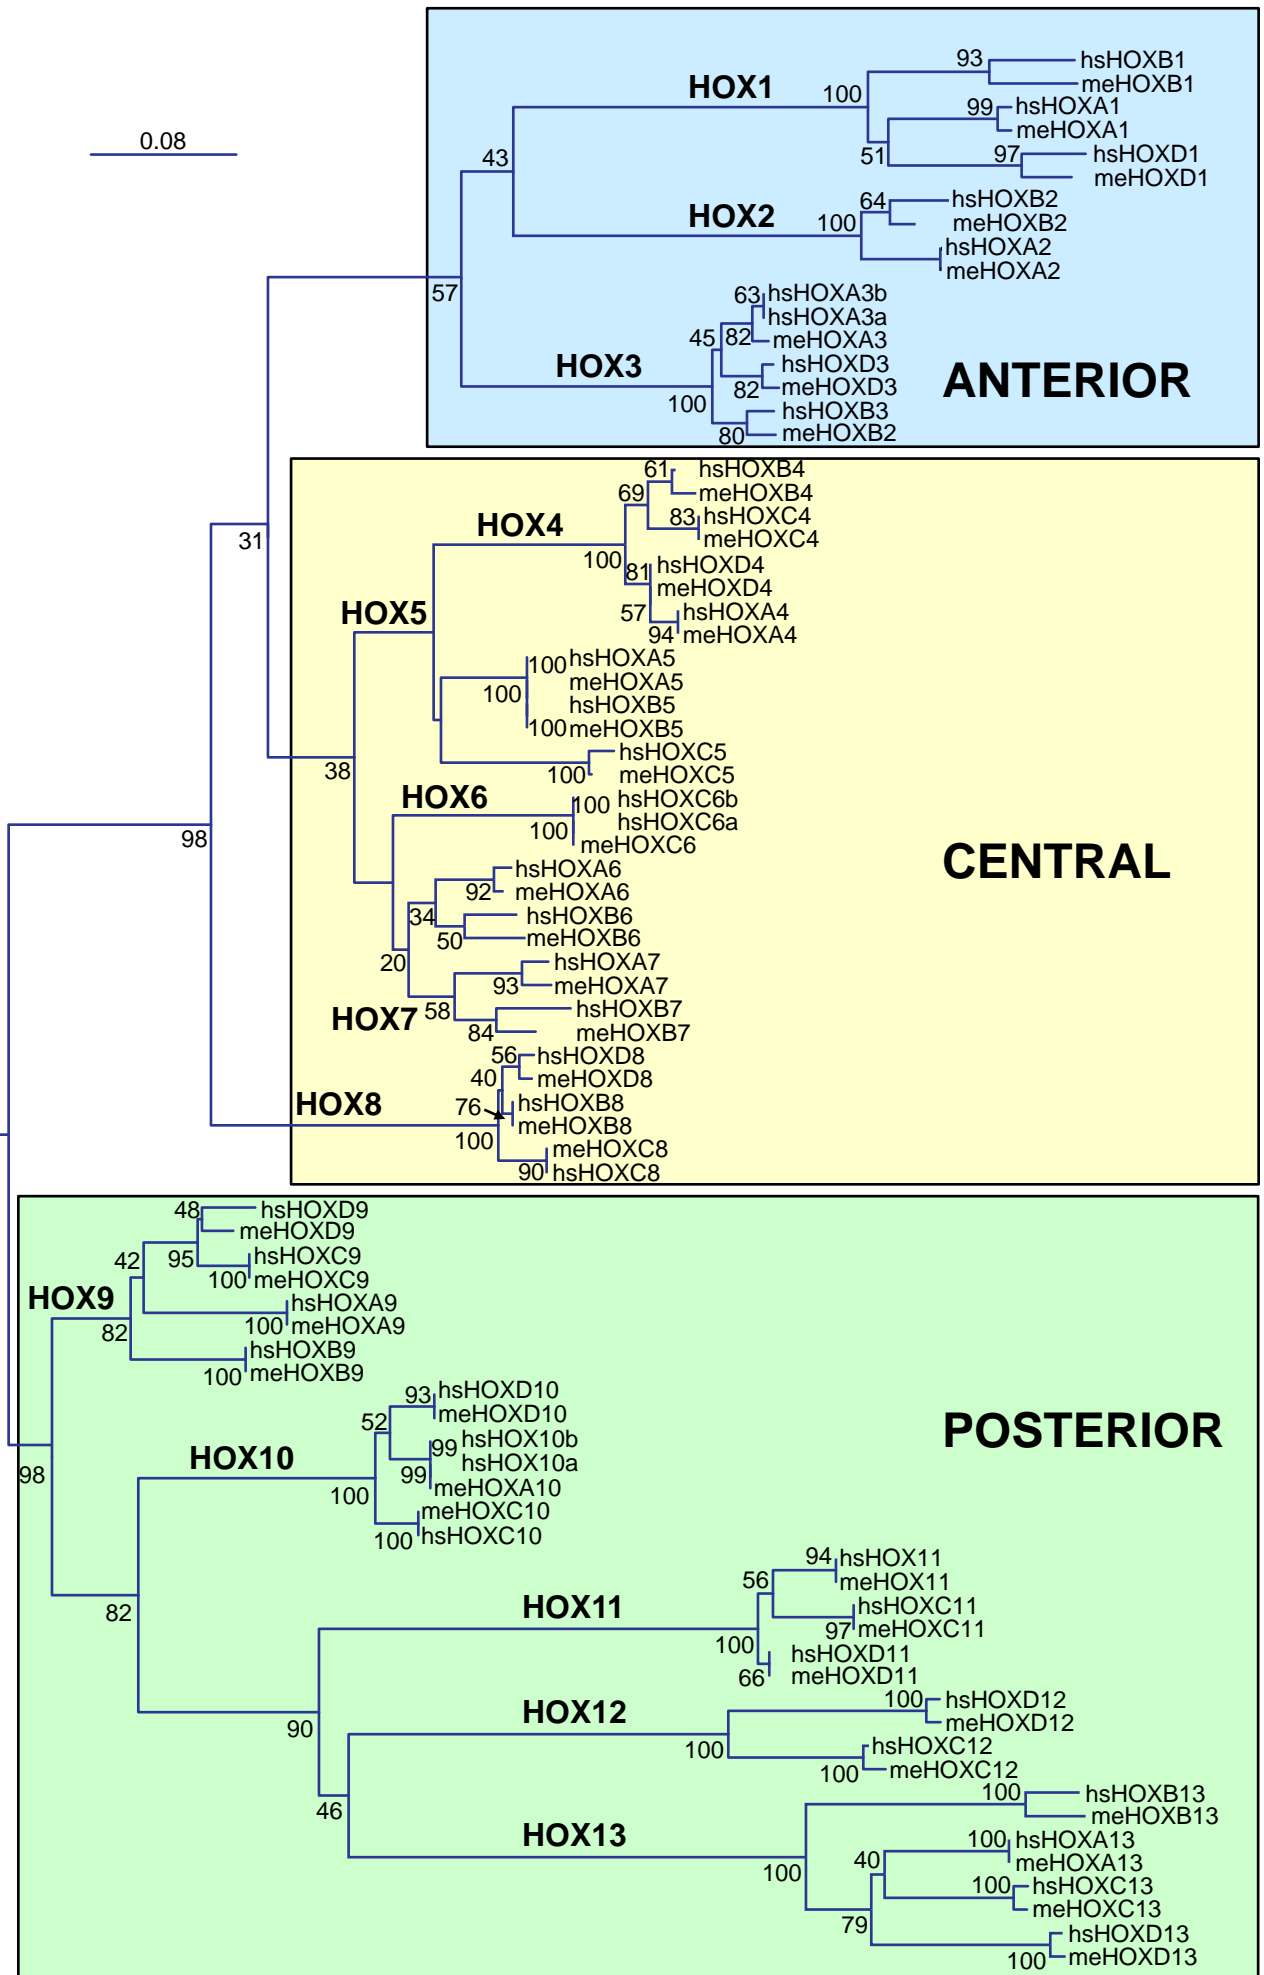

Supplement: 1471-2164-13-251-S11.pdf [file 1471-2164-13-251-S11.pdf]
